# Supplementary material for: Genetic Diversity and Population Structure of the Giant Mottled Eel, Anguilla marmorata Quoy & Gaimard, 1824 in Central Vietnam
Source: MDPI journal article supplement (doi:10.3390/fishes7050286), 2022-10-14
Supplement: s1 [file s1]

Archive with 3 entries (3 files):
- Supplementary Figure S1 (Nguyen et al.).pdf
- Supplementary Figure S2 (Nguyen et al.).pdf
- Supplementary Figure S3 (Nguyen et al.).pdf
