# Supplementary material for: Genetic Diversity and Population Structure of the Giant Mottled Eel, Anguilla marmorata Quoy & Gaimard, 1824 in Central Vietnam
Source: MDPI journal article supplement (doi:10.3390/fishes7050286), 2022-10-14
Supplement: s1 [file s1]

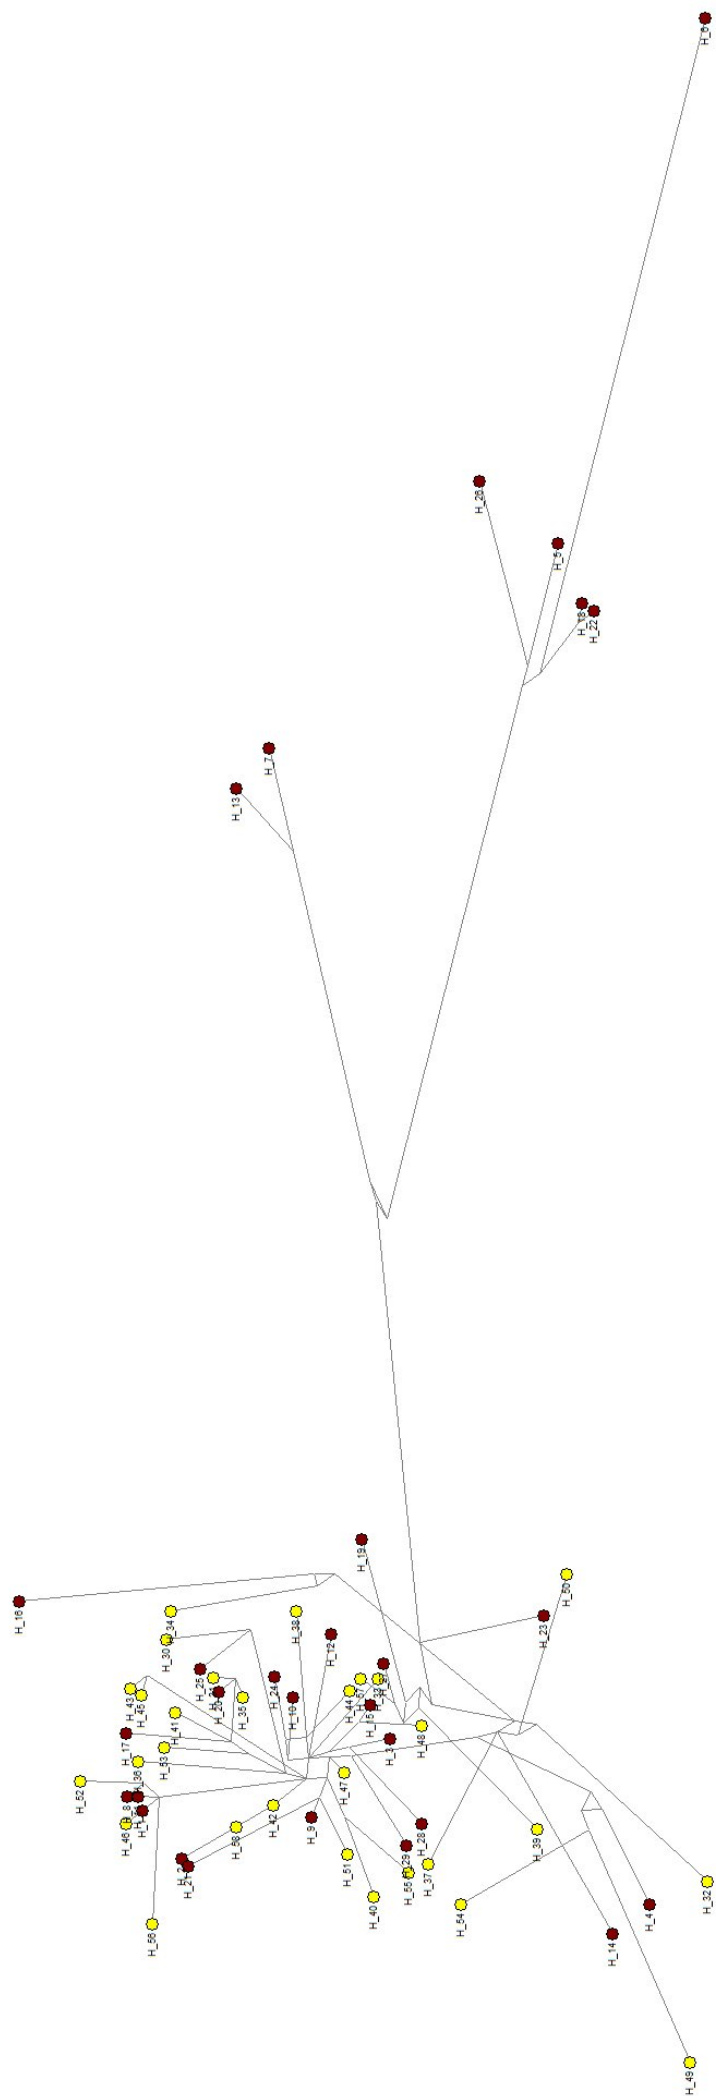

**Figure S3:** Haplotype networks between BD1 and QN. BD1 and QN populations are presented by red and yellow circles, respectively
