# Supplementary material for: Genetic Diversity and Population Structure of the Giant Mottled Eel, Anguilla marmorata Quoy & Gaimard, 1824 in Central Vietnam
Source: MDPI journal article supplement (doi:10.3390/fishes7050286), 2022-10-14
Supplement: s1 [file s1 › Supplementary Figure S1 (Nguyen et al.).pdf]

# North Pacific

Vietnam

Japan, Taiwan

Philippines, Sulawesi

QT: Quang Tri

BD1: Binh Dinh 01

BD2: Binh Dinh 02

PY1: Phu Yen 01

PY2: Phu Yen 02

QN: Quang Ngai

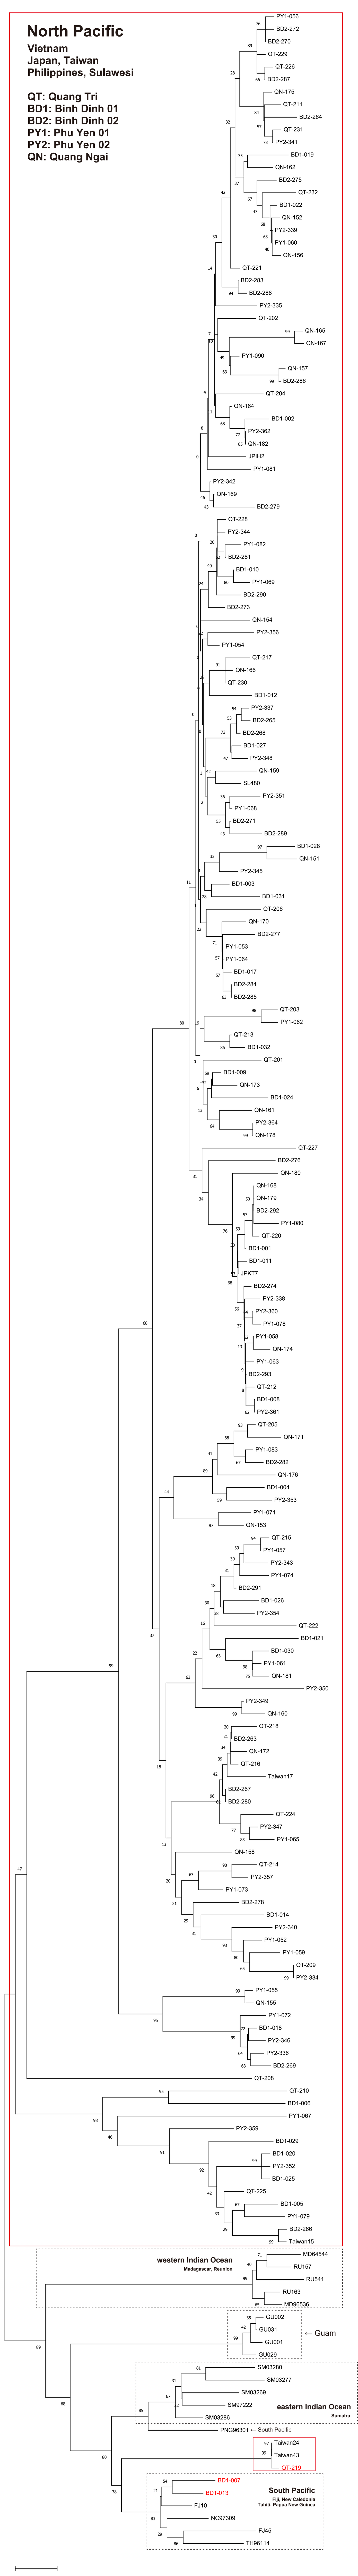

Figure S1: The neighbor-joining tree for *Anguilla marmorata* based on the mitochondrial control region
